# Supplementary material
Source: publisher figshare collection journal article supplement (https://karger.figshare.com/articles/dataset/_/13655522)
Supplement: Supplementary file 1 [file 1]

Supplementary Figure 1. Procurement biopsy characteristics mean and standard error.

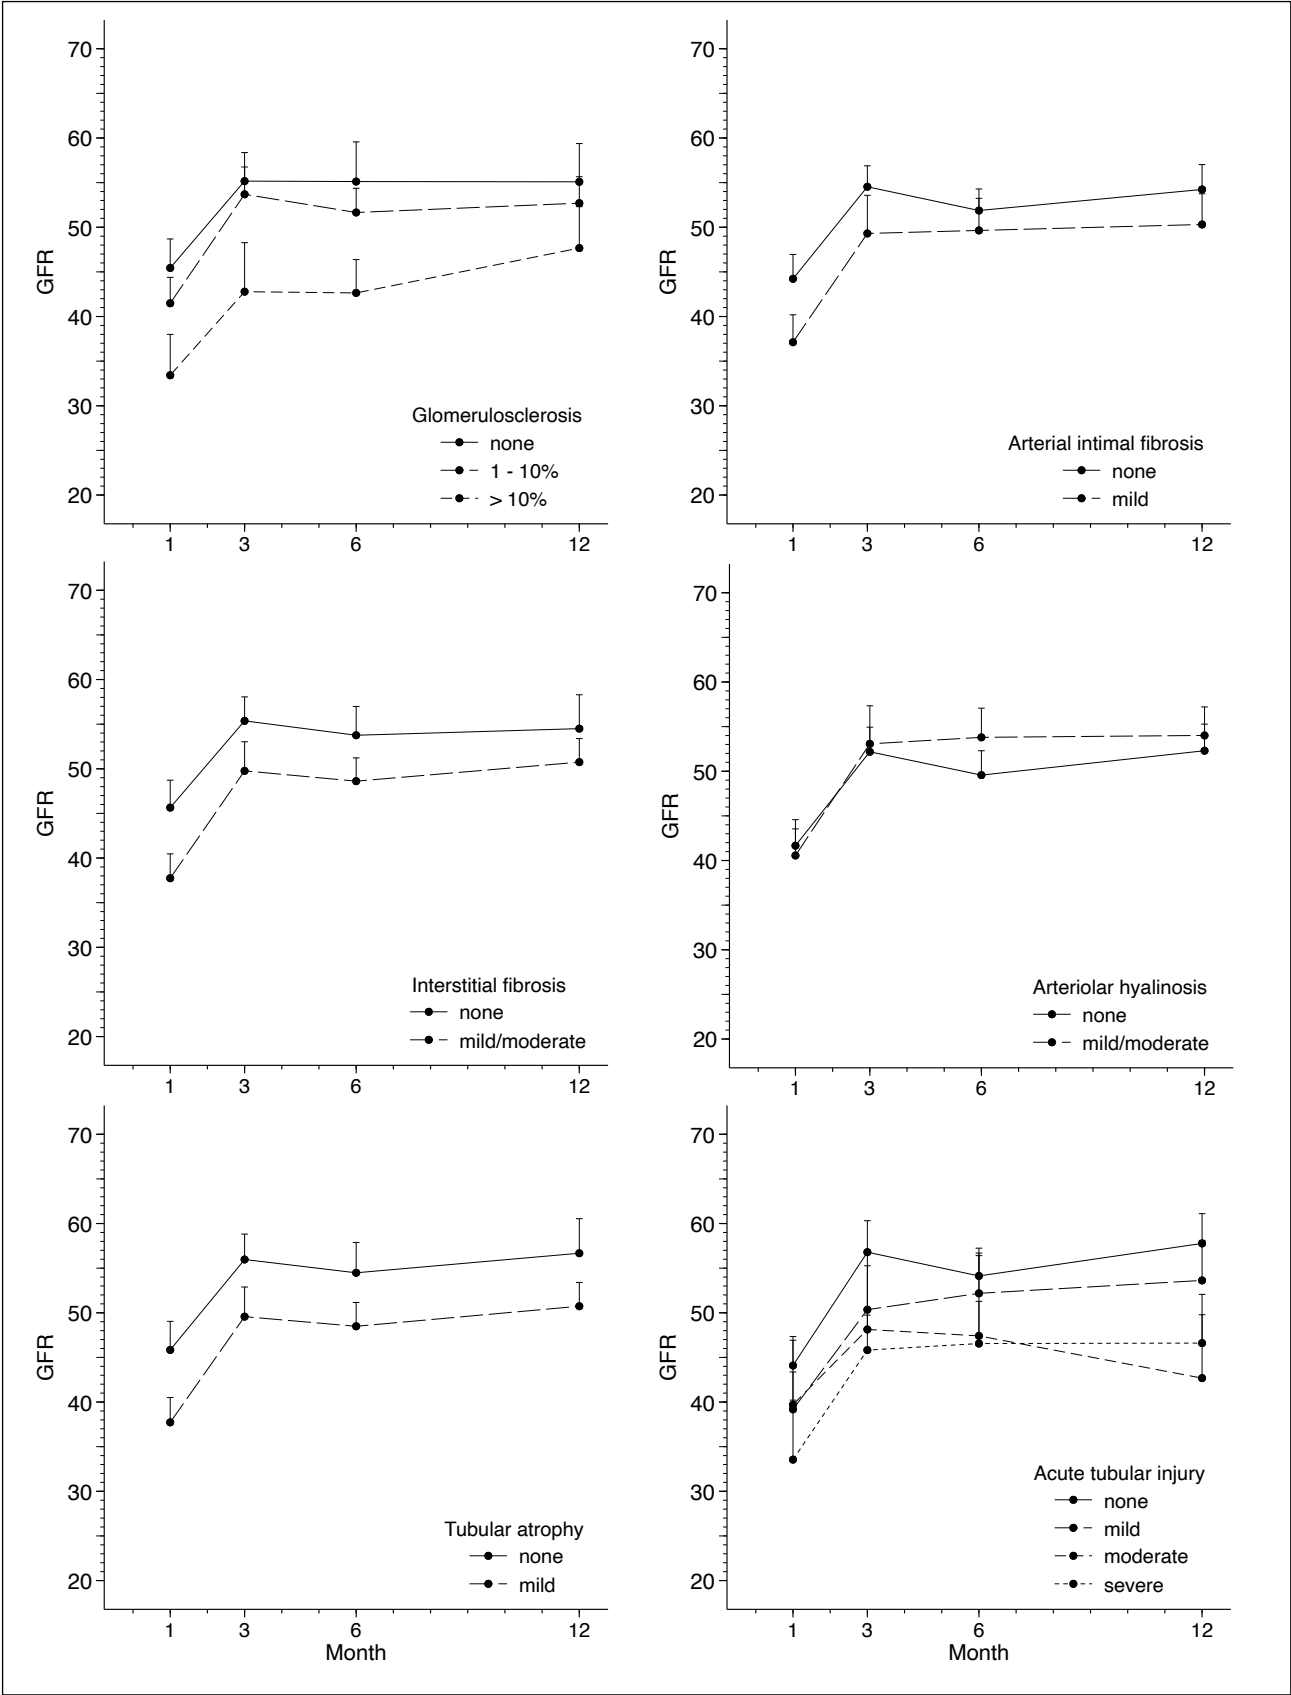

Note: One case of moderate interstitial fibrosis and one case of moderate arteriolar hyalinosis was merged in a mild/moderate category.
