# Supplementary material
Source: publisher figshare collection journal article supplement (https://karger.figshare.com/articles/dataset/_/13655522)

Supplementary Figure 2. Reperfusion biopsy characteristics, mean and standard error

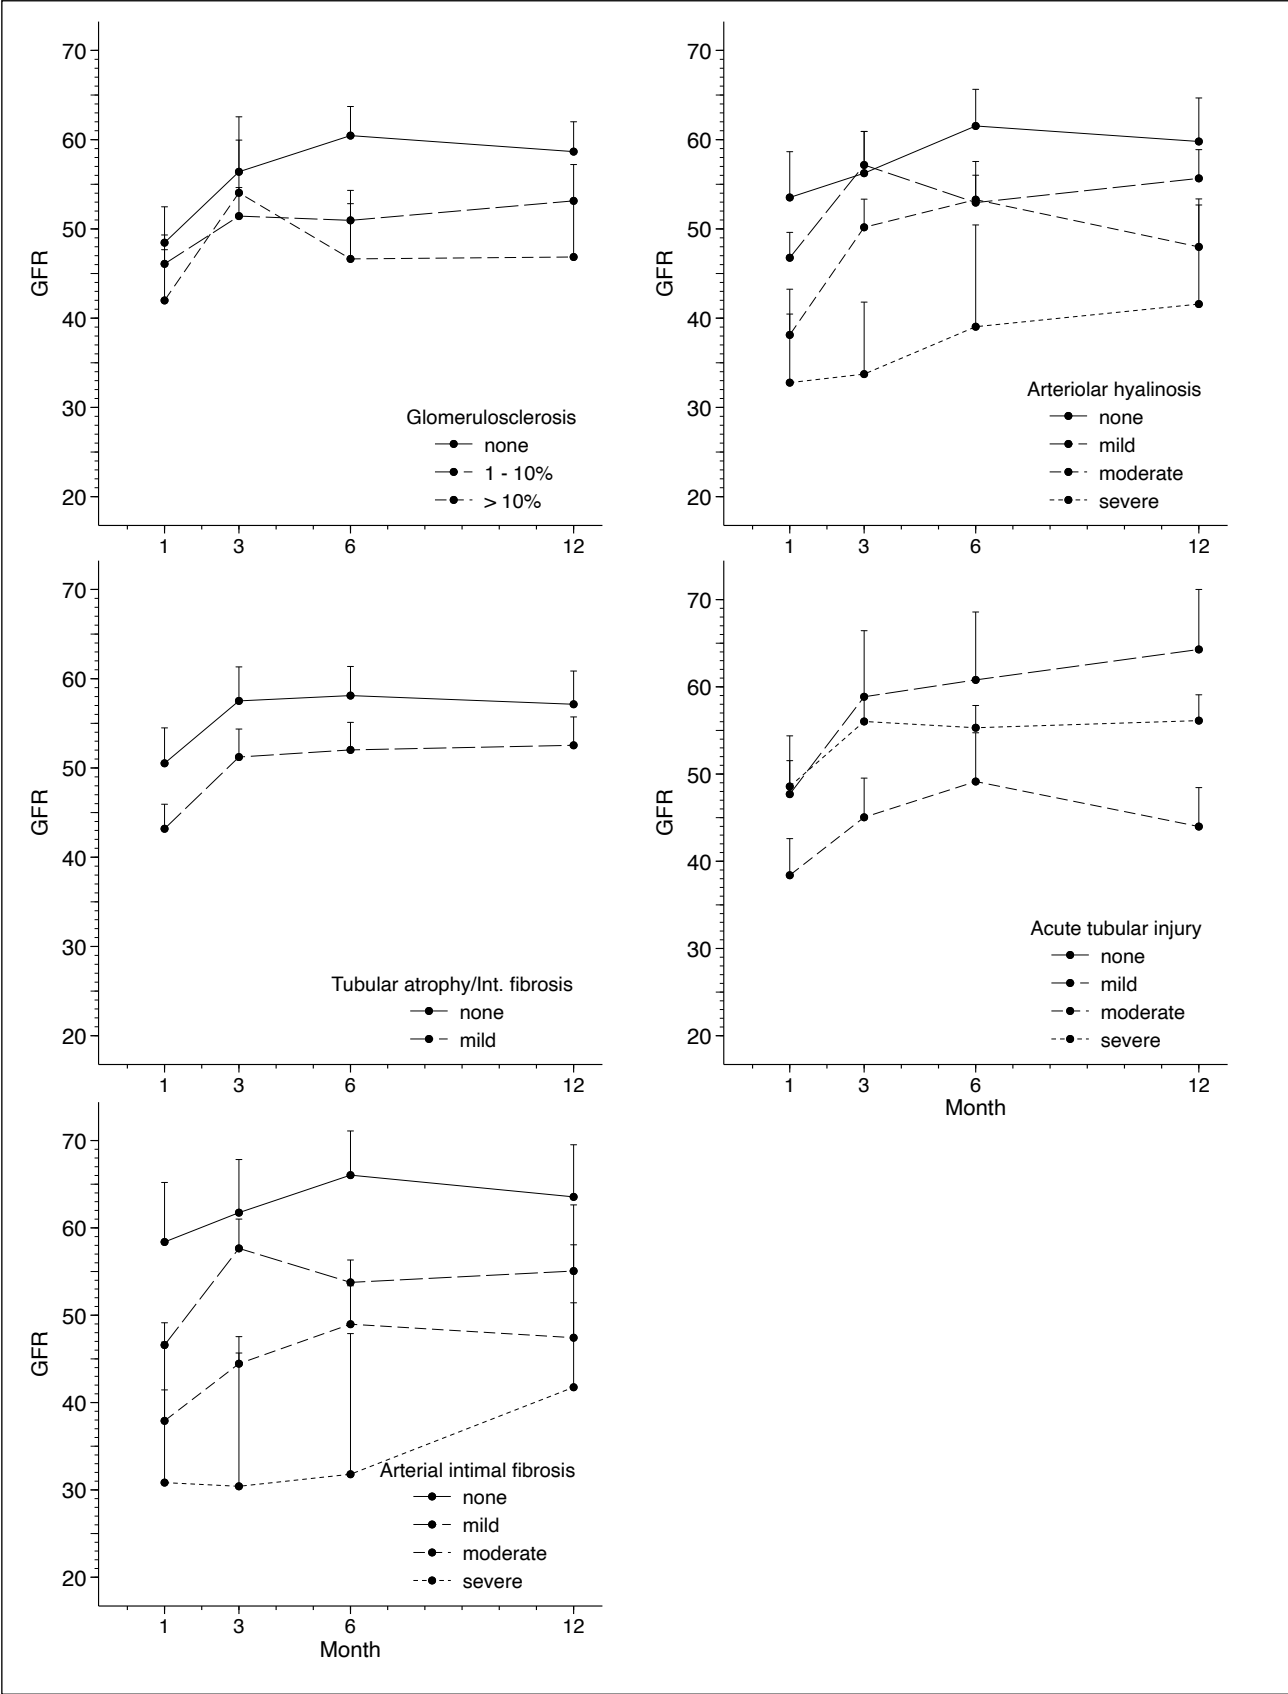

Supplement: Supplementary file 2 [file 1]
